# Supplementary material
Source: PubMed Central journal article supplement (PMC8406434)
Supplement: pkab065_supplementary_data.pdf [file pkab065_supplementary_data.pdf]

## SUPPLEMENTARY MATERIALS

### Supplementary Methods

#### Expanded description of Statistical Analyses

First, we modelled the association between physical activity patterns and incident endometrial cancer using Cox proportional hazard models. Letting  $(e_{i1}, \dots, e_{i5})$  denote the binary variables encoding LTPA with  $e_{i1}$  representing the inactive group,  $x_i$  denote BMI in midlife<sup>i</sup>, and  $(z_{i1}, \dots, z_{ip})$  denote covariates, we assumed the following model:

$$\log(HR_i) \propto \sum_{j=2}^5 \beta_{Ej}^1 e_{ij} + \beta_X^1 x_i + \sum_{j=1}^p \beta_{Zj}^1 z_{ij} \quad (1)$$

Note, the superscripts on the  $\beta$  will differentiate the coefficients for the three types of models (i.e., exposure/outcome, exposure/mediator, mediator/outcome). Second, we modeled the association between long-term LTPA and midlife BMI using multinomial logistic regression, with the midlife BMI outcome categorized as normal weight ( $<25.0$  kg/m<sup>2</sup>), overweight ( $25.0$ – $29.9$  kg/m<sup>2</sup>), obese class I ( $30.0$ – $34.9$  kg/m<sup>2</sup>), obese class II ( $35.0$ – $39.9$  kg/m<sup>2</sup>), and obese class III ( $\geq 40.0$  kg/m<sup>2</sup>). Letting  $(M_{i1}, \dots, M_{i4})$  denote the binary variables encoding midlife BMI with  $M_{i1}$  representing the normal weight group and letting  $OR_{ij} = P(M_{ij} = 1)/P(M_{i1} = 1)$  with  $P$  denoting the probability of the event, we assumed the following set of models

$$\log(OR_{ij}) \propto \sum_{j=2}^5 \beta_{Ej}^2 e_{ij} + \beta_X^2 x_i + \sum_{j=1}^p \beta_{Zj}^2 z_{ij} \quad (2)$$

Third, we modeled the association between midlife BMI (i.e., same categories as above) and endometrial cancer using Cox proportional hazard models. We considered models with and without LPTA:

$$\log(HR_i) \propto \sum_{j=2}^4 \beta_{Mj}^3 M_{ij} + \beta_X^3 x_i + \sum_{j=1}^p \beta_{Zj}^3 z_{ij} \quad (3)$$

$$\log(HR_i) \propto \sum_{j=2}^4 \beta_{Mj}^4 M_{ij} + \beta_X^4 x_i + \sum_{j=1}^p \beta_{Zj}^4 z_{ij} + \sum_{j=2}^5 \beta_{Ej}^4 e_{ij} \quad (4)$$

We then explored the relationship between long-term LTPA, midlife obesity and endometrial cancer using the mediation framework proposed by Lange et al.<sup>30</sup> Here, the “total” effect of LTPA on endometrial cancer can be decomposed into an “indirect” effect mediated by midlife BMI and a “direct” effect (see Figure 1). For performing the mediation analysis, we consider each of the four non-reference LTPA categories separately, i.e., maintain low, maintain high, increasers, and decreasers (e.g., we perform four analyses; each analysis considers only the subset of the cohort in the reference or target LTPA category). Using standard counterfactual notation<sup>30</sup>, let  $T_i(e_{ij}, M_i(e_{ij}^*))$  denote an individual's survival time (i.e., time until cancer) if the exposure is set to  $e_{ij}$  and the mediator,  $M$ , is set to the value it would have taken had the exposure been set to  $e_{ij}^*$ . Then, we assume the log-hazard can be modeled as

$$\log(P(T_i = t | T_i \geq t, e_{ij}, M_i(e_{ij}^*))) \propto \beta_0 + \beta_{Ej} e_{ij} + \beta_{e^*j} e_{ij}^* + \beta_x x_i + \sum_{j=1}^p \beta_{zj} z_{ij} \quad (5)$$

We define the natural indirect effect (HR<sub>I</sub>) by  $\exp(\beta_{e^*j})$ , the natural direct effect (HR<sub>D</sub>) by  $\exp(\beta_{ej})$ , and the proportion mediated  $\beta_{e^*j}/(\beta_{e^*j} + \beta_{ej})$ ; we estimate these quantities and their 95% confidence intervals using the simulation approach developed by Lange<sup>30</sup> with the simulation model defined by equation (4).

## Supplementary Tables

Supplementary Table 1. Baseline characteristic for analytical sample and full cohort.

| Demographic/Behavior Characteristics                    | Not included in the study <sup>a</sup> | Analytical sample | Diff (in %) <sup>b</sup> |
|---------------------------------------------------------|----------------------------------------|-------------------|--------------------------|
| Total No.                                               | 59,631                                 | 67,705            |                          |
| Mean age (SD), y                                        | 63.0 (5.4)                             | 62.3 (5.5)        | -1.1                     |
| Non-Hispanic White, No. (%)                             | 52,985 (88.9)                          | 62,688 (92.6)     | 3.7                      |
| Less than high school, No. (%)                          | 4,058 (6.8)                            | 2,625 (3.9)       | -3.0                     |
| Smoker: >20 cig/day, No. (%)                            | 2,231 (3.7)                            | 2,439 (3.6)       | -0.1                     |
| LTPA at age group                                       |                                        |                   |                          |
| Mean (SD), h/wk                                         |                                        |                   |                          |
| 15-18 y                                                 | 4.0 (2.8)                              | 4.0 (2.8)         | 0.0                      |
| 19-29 y                                                 | 4.2 (2.8)                              | 4.1 (2.7)         | -0.1                     |
| 35-39 y                                                 | 4.1 (2.7)                              | 4.1 (2.6)         | -0.1                     |
| 40-61 y                                                 | 3.5 (2.7)                              | 3.7 (2.7)         | 0.0                      |
| BMI, No. (%)                                            |                                        |                   |                          |
| At 18 y $\geq$ 30.0 kg/m <sup>2</sup>                   | 802 (1.3)                              | 1,005 (1.5)       | 0.2                      |
| Current $\geq$ 30.0 kg/m <sup>2</sup>                   | 13,382 (22.4)                          | 14,109 (20.8)     | -1.6                     |
| Healthy Eating Index, Men (SD), 0-100 <sup>c</sup>      | 68.9 (9.4)                             | 69.2 (9.3)        | 0.4                      |
| Energy intake, Mean (SD), kcal/day <sup>d</sup>         | 1.6 (0.8)                              | 1.6 (0.7)         | 0.0                      |
| Alcohol, Mean (SD), g/d                                 | 5.7 (18.4)                             | 6.6 (17.9)        | 15.8                     |
| Nulliparous, No. (%)                                    | 7,416 (12.4)                           | 12,103 (17.9)     | 5.5                      |
| Use of oral contraceptives - never, No. (%)             | 36,161 (60.6)                          | 39,533 (58.4)     | -2.2                     |
| Menopausal hormone therapy use – Estrogen only, No. (%) | 5,772 (9.7)                            | 4,249 (6.3)       | -3.4                     |

<sup>a</sup>Includes women that responded to the Risk Factor Questionnaire and whose questionnaires were not completed by proxies and did not have a diagnosis of cancer. BMI = body mass index; LTPA = leisure time physical activity

<sup>b</sup>Computed as the percent difference between the analytical sample and original cohort.

<sup>c</sup>2015 HEI scores range from 0 (least healthy) to a 100 (most healthy) and describe diet quality as recommended by the 2015-2020 Dietary Guidelines for Americans.

<sup>d</sup>Indicates kcal/day per 1000.

Supplementary Table 2. Odds of long-term leisure time physical activity (LTPA) pattern assignment by BMI classification at age 18 years<sup>a</sup>.

| BMI at age 18yrs                                 | Odds of long-term LTPA pattern assignment <sup>b</sup> , OR (95% CI) <sup>c</sup> |                             |                         |                         |
|--------------------------------------------------|-----------------------------------------------------------------------------------|-----------------------------|-------------------------|-------------------------|
|                                                  | Maintain low<br>(n=11,125)                                                        | Maintain high<br>(n=21,843) | Increases<br>(n=13,469) | Decreases<br>(n=15,707) |
| Overweight/Obese (BMI ≥ 25.0 kg/m <sup>2</sup> ) | 0.60 (0.49, 0.74)                                                                 | 0.37 (0.30, 0.46)           | 0.64 (0.52, 0.79)       | 0.43 (0.35, 0.53)       |
| Normal weight (BMI < 25.0 kg/m <sup>2</sup> )    | Referent                                                                          | Referent                    | Referent                | Referent                |

<sup>a</sup>Participants with little or no physical activity (<1 hr/wk) at each age period were classified as Inactive; those maintaining low levels of activity over time were classified as Maintaining low activity; those maintaining high levels of activity over time were classified as Maintaining high activity; those that increased their activity over time were classified as Increases; and those that decreased their activity over time were classified as Decreases. BMI = body mass index; OR = odds ratio; CI = confidence interval

<sup>b</sup>The odds that an overweight/obese participant would be assigned to a given long-term leisure time physical activity (LTPA) pattern, as compared to the inactive pattern. For example, to calculate the first set of values (0.60 [0.49, 0.74]), we limited the population to individuals with either the inactive or maintain-low pattern, and then performed logistic regression with LTPA pattern as the dependent variable and overweight/obese status as the independent variable.

<sup>c</sup>Odds ratios were adjusted for: age (years), race-ethnicity (Non-Hispanic white, Non-Hispanic black, Hispanic, Other or missing), education (less than high school, high school, post high-school or some college, Bachelor degree or more, missing), smoking status/dose (never smoker, former smoker and ≤20 cigarettes/day, former smoker and >20 cigarettes/day, current smoker and ≤20 cigarettes/day, current smoker and > 20 cigarettes/day, missing), diet quality (2015 Healthy Eating Index; 0–100 points), total energy intake (kcal/day), alcohol consumption (grams/day), parity (number of births), use of oral contraceptives (never or <1 year, 1–4 years, 5–9 years, ≥10 years, missing), and menopausal hormone therapy use (never, continuous estrogen plus progestin (EPT) use [15+ days progestin/month], sequential EPT [<15 days progestin/month], estrogen only, missing).

Supplementary Table 3. Examination of confounding of physical activity-endometrial cancer risk with increased adjustment for covariates.

| Effect                                                | Long-term LTPA pattern <sup>a</sup> , OR (95% CI) |                            |                             |                            |                          |
|-------------------------------------------------------|---------------------------------------------------|----------------------------|-----------------------------|----------------------------|--------------------------|
|                                                       | Inactive<br>(n=4 148)                             | Maintain low<br>(n=12 577) | Maintain high<br>(n=19 935) | Increasesers<br>(n=10 637) | Decreasers<br>(n=14 059) |
| Endometrial cancers, No. (%)                          | 149 (2.7)                                         | 245 (2.2)                  | 439 (2.0)                   | 259 (1.9)                  | 376 (2.4)                |
| Model 1: LTPA trajectory                              | Referent                                          | 0.81 (0.66, 0.99)          | 0.74 (0.61, 0.89)           | 0.70 (0.57, 0.85)          | 0.90 (0.74, 1.08)        |
| Model 2: Model 1 + demographics <sup>b</sup>          | Referent                                          | 0.81 (0.66, 1.00)          | 0.73 (0.61, 0.88)           | 0.70 (0.57, 0.85)          | 0.90 (0.75, 1.09)        |
| Model 3: Model 2 + smoking + diet + calories          | Referent                                          | 0.82 (0.67, 1.01)          | 0.76 (0.63, 0.91)           | 0.71 (0.58, 0.87)          | 0.93 (0.77, 1.13)        |
| Model 4: Model 3 + oral contraceptives + MHT + parity | Referent                                          | 0.84 (0.69, 1.03)          | 0.79 (0.66, 0.96)           | 0.73 (0.60, 0.90)          | 0.97 (0.80, 1.18)        |
| Model 5: Model 4 + BMI at 18y                         | Referent                                          | 0.85 (0.69, 1.04)          | 0.81 (0.67, 0.98)           | 0.74 (0.61, 0.91)          | 0.98 (0.81, 1.19)        |

<sup>a</sup> Participants with little or no physical activity (<1 hr/wk) at each age period were classified as Inactive; those maintaining low levels of activity over time were classified as Maintaining low activity; those maintaining high levels of activity over time were classified as Maintaining high activity; those that increased their activity over time were classified as Increasesers; and those that decreased their activity over time were classified as Decreasers. CI = confidence interval; LTPA = leisure time physical activity ; MHT = menopausal hormone therapy use; OR = odds ratio.

<sup>b</sup> Includes age at baseline, race-ethnicity, and education

Supplementary Table 4. Risk for BMI classification at midlife (50-71 years) by long-term leisure time physical activity (LTPA) pattern.

| BMI classification (kg/m <sup>2</sup> ) | Long-term LTPA pattern <sup>a</sup> , OR (95% CI) <sup>b</sup> |                            |                             |                            |                          |
|-----------------------------------------|----------------------------------------------------------------|----------------------------|-----------------------------|----------------------------|--------------------------|
|                                         | Inactive<br>(n=5,561)                                          | Maintain low<br>(n=11,125) | Maintain high<br>(n=21,843) | Increasesers<br>(n=13,469) | Decreasers<br>(n=15,707) |
| Overweight (25.0-29.9)                  | Referent                                                       | 1.06 (0.98, 1.15)          | 0.84 (0.78, 0.90)           | 0.75 (0.70, 0.81)          | 1.29 (1.20, 1.39)        |
| Obese - class I/II (30.0-39.0)          | Referent                                                       | 0.90 (0.83, 0.99)          | 0.50 (0.46, 0.55)           | 0.45 (0.41, 0.49)          | 1.33 (1.22, 1.45)        |
| Obese - class III (≥40.0)               | Referent                                                       | 0.63 (0.51, 0.77)          | 0.32 (0.26, 0.39)           | 0.23 (0.19, 0.29)          | 1.47 (1.23, 1.76)        |

<sup>a</sup> Participants with little or no physical activity (<1 hr/wk) at each age period were classified as Inactive; those maintaining low levels of activity over time were classified as Maintaining low activity; those maintaining high levels of activity over time were classified as Maintaining high activity; those that increased their activity over time were classified as Increasesers; and those that decreased their activity over time were classified as Decreasers. BMI = body mass index; LTPA = leisure time physical activity; CI = confidence interval

<sup>b</sup>Odds ratios were adjusted for: age (years), race-ethnicity (Non-Hispanic white, Non-Hispanic black, Hispanic, Other or missing), education (less than high school, high school, post high-school or some college, Bachelor degree or more, missing), smoking status/dose (never smoker, former smoker and ≤20 cigarettes/day, former smoker and >20 cigarettes/day, current smoker and ≤20 cigarettes/day, current smoker and > 20 cigarettes/day, missing), diet quality (2015 Healthy Eating Index; 0–100 points), total energy intake (kcal/day), alcohol consumption (grams/day), parity (number of births), use of oral contraceptives (never or <1 year, 1–4 years, 5–9 years, ≥10 years, missing), menopausal hormone therapy use (never, continuous estrogen plus progestin (EPT) use [15+ days progestin/month], sequential EPT [<15 days progestin/month], estrogen only, missing) and, body mass index at age 18 years (normal weight [<25.0 kg/m<sup>2</sup>], overweight [25.0–29.9 kg/m<sup>2</sup>], obese class I [30.0–34.9 kg/m<sup>2</sup>], obese class II [35.0–39.9 kg/m<sup>2</sup>], and obese class III [≥40.0 kg/m<sup>2</sup>]).

Supplementary Table 5. Summary of mediation analysis without adjustments for BMI at age 18 yrs.

| Effect                                                | Long-term LTPA patterns <sup>a</sup> , HR (95% CI) |                            |                             |                            |                          |
|-------------------------------------------------------|----------------------------------------------------|----------------------------|-----------------------------|----------------------------|--------------------------|
|                                                       | Inactive<br>(n=5,561)                              | Maintain low<br>(n=11,125) | Maintain high<br>(n=21,843) | Increasesers<br>(n=13,469) | Decreasers<br>(n=15,707) |
| Total effect <sup>b,c</sup>                           | Referent                                           | 0.84 (0.66, 0.99)          | 0.79 (0.66, 0.95)           | 0.73 (0.59, 0.89)          | 0.98 (0.83, 1.21)        |
| Indirect effect (through midlife BMI) <sup>c</sup>    | Referent                                           | 0.95 (0.92, 0.99)          | 0.84 (0.82, 0.88)           | 0.84 (0.80, 0.87)          | 1.04 (1.01, 1.07)        |
| Direct Effect <sup>c</sup>                            | Referent                                           | 0.88 (0.69, 1.04)          | 0.90 (0.78, 1.12)           | 0.88 (0.73, 1.06)          | 0.93 (0.80, 1.16)        |
| Proportion of LTPA through BMI at midlife, % (95% CI) | Referent                                           | 29.4 (0.0, 100.0)          | 69.3 (39.5, 100.0)          | 57.5 (33.1, 100.0)         | NE                       |

<sup>a</sup> Participants with little or no physical activity (<1 hr/wk) at each age period were classified as Inactive; those maintaining low levels of activity over time were classified as Maintaining low activity; those maintaining high levels of activity over time were classified as Maintaining high activity; those that increased their activity over time were classified as Increasesers; and those that decreased their activity over time were classified as Decreasers. [ BMI – Body mass index; HR – hazard ratio; 95% CI – 95% confidence intervals; REF – reference; NE – Not estimated (i.e., the denominator for the proportion was approximately 0 and the estimation was not stable).

<sup>b</sup> The total effect presented in this table can differ from the effects provided in Supplementary Table 3 (model 4) by a residual amount.

<sup>c</sup> Hazard ratios were adjusted for: age (years), race-ethnicity (Non-Hispanic white, Non-Hispanic black, Hispanic, Other or missing), education (less than high school, high school, post high-school or some college, Bachelor degree or more, missing), smoking status/dose (never smoker, former smoker and ≤20 cigarettes/day, former smoker and >20 cigarettes/day, current smoker and ≤20 cigarettes/day, current smoker and > 20 cigarettes/day, missing), diet quality (2015 Healthy Eating Index; 0–100 points), total energy intake (kcal/day), alcohol consumption (grams/day), parity (number of births), use of oral contraceptives (never or <1 year, 1–4 years, 5–9 years, ≥10 years, missing), and menopausal hormone therapy use (never, continuous estrogen plus progestin (EPT) use [15+ days progestin/month], sequential EPT [<15 days progestin/month], estrogen only, missing). Models also included BMI in midlife (normal weight [<25.0 kg/m<sup>2</sup>], overweight [25.0–29.9 kg/m<sup>2</sup>], obese class I [30.0–34.9 kg/m<sup>2</sup>], obese class II [35.0–39.9 kg/m<sup>2</sup>], and obese class III [≥40.0 kg/m<sup>2</sup>]) as a mediator of the activity-endometrial cancer association.

Supplementary Table 6. Total effect for selected long-term leisure time physical activity (LTPA) patterns stratified by confounders and BMI in midlife.

| Stratified factor                 | Events<br>No. (%) | Inactive <sup>a</sup><br>HR (95% CI) <sup>c</sup> | Maintain high <sup>b</sup><br>HR (95% CI) <sup>c</sup> | <i>P</i> <sub>interaction</sub> |
|-----------------------------------|-------------------|---------------------------------------------------|--------------------------------------------------------|---------------------------------|
| Age group                         |                   |                                                   |                                                        |                                 |
| 50-59 (n=24,248)                  | 504 (2.0)         | 1.00 (Ref)                                        | 0.72 (0.53, 0.99)                                      | 0.76                            |
| 60-72 (n=43,457)                  | 964 (2.2)         | 1.00 (Ref)                                        | 0.85 (0.67, 1.08)                                      |                                 |
| BMI at 18y, kg/m <sup>2</sup>     |                   |                                                   |                                                        |                                 |
| <25.0 (n=56,037)                  | 1,182 (2.1)       | 1.00 (Ref)                                        | 0.80 (0.64, 0.99)                                      | 0.81                            |
| 25.0+ (n=4,384)                   | 149 (3.3)         | 1.00 (Ref)                                        | 0.83 (0.48, 1.44)                                      |                                 |
| BMI at midlife, kg/m <sup>2</sup> |                   |                                                   |                                                        |                                 |
| <25.0 (n=32,401)                  | 452 (1.4)         | 1.00 (Ref)                                        | 1.13 (0.76, 1.69)                                      | 0.43                            |
| 25.0+ (n=35,304)                  | 1,016 (2.9)       | 1.00 (Ref)                                        | 0.78 (0.63, 0.97)                                      |                                 |
| Alcohol, g/day                    |                   |                                                   |                                                        |                                 |
| <1.1 (n=33,647)                   | 804 (2.4)         | 1.00 (Ref)                                        | 0.78 (0.61, 0.99)                                      | 0.77                            |
| 1.1+ (n=34,058)                   | 664 (1.9)         | 1.00 (Ref)                                        | 0.90 (0.65, 1.23)                                      |                                 |
| 2015 HEI, % <sup>d</sup>          |                   |                                                   |                                                        |                                 |
| <70.2 (n=33,837)                  | 731 (2.2)         | 1.00 (Ref)                                        | 0.77 (0.60, 0.99)                                      | 0.81                            |
| 70.2+ (n=33,868)                  | 737 (2.2)         | 1.00 (Ref)                                        | 0.86 (0.64, 1.15)                                      |                                 |
| Calories, kcal/d <sup>e</sup>     |                   |                                                   |                                                        |                                 |
| <1.5 (n=33,846)                   | 731 (2.2)         | 1.00 (Ref)                                        | 1.00 (0.75, 1.32)                                      | 0.02                            |
| 1.5+ (n=33,859)                   | 737 (2.2)         | 1.00 (Ref)                                        | 0.66 (0.51, 0.86)                                      |                                 |
| Parity, No.                       |                   |                                                   |                                                        |                                 |
| 0 (n=12,103)                      | 342 (2.8)         | 1.00 (Ref)                                        | 0.76 (0.54, 1.06)                                      | 0.08                            |
| 1+ (n=55,602)                     | 1,126 (2.0)       | 1.00 (Ref)                                        | 0.85 (0.68, 1.08)                                      |                                 |
| Ever used oral contraceptives     |                   |                                                   |                                                        |                                 |
| Yes (n=27,788)                    | 505 (1.8)         | 1.00 (Ref)                                        | 0.89 (0.62, 1.26)                                      | 0.57                            |
| No (n=39,533)                     | 956 (2.4)         | 1.00 (Ref)                                        | 0.77 (0.61, 0.96)                                      |                                 |
| Menopause HT                      |                   |                                                   |                                                        |                                 |
| Continuous EPT (n=14,820)         | 228 (1.5)         | 1.00 (Ref)                                        | 0.85 (0.51, 1.44)                                      | 0.60                            |

|                                   |             |            |                   |      |
|-----------------------------------|-------------|------------|-------------------|------|
| Sequential EPT + ET<br>(n=14,002) | 361 (2.6)   | 1.00 (Ref) | 0.69 (0.47, 1.00) |      |
| Never (n=34,634)                  | 781 (2.3)   | 1.00 (Ref) | 0.84 (0.65, 1.09) |      |
| Diabetes                          |             |            |                   |      |
| Yes (n=3,982)                     | 125 (3.1)   | 1.00 (Ref) | 0.57 (0.32, 1.03) | 0.63 |
| No (n=63,723)                     | 1,343 (2.1) | 1.00 (Ref) | 0.86 (0.70, 1.05) |      |
| Cardiovascular disease            |             |            |                   |      |
| Yes (n=4,578)                     | 100 (2.2)   | 1.00 (Ref) | 0.82 (0.40, 1.68) | 0.51 |
| No (n=63,127)                     | 1,368 (2.2) | 1.00 (Ref) | 0.81 (0.67, 0.99) |      |

<sup>a</sup>Reported no activity at each age period (n=5,561); Abbreviations: HT = hormone therapy; EPT = Estrogen-plus-progestin therapy; ET = Estrogen therapy; HEI = Healthy Eating Index; BMI = body mass index; HR = hazard ratio; CI = confidence interval

<sup>b</sup>Maintained high levels of activity over time (n=21,843);

<sup>c</sup>Hazard ratios were adjusted for: age (years), race-ethnicity (Non-Hispanic white, Non-Hispanic black, Hispanic, Other or missing), education (less than high school, high school, post high-school or some college, Bachelor degree or more, missing), smoking status/dose (never smoker, former smoker and ≤20 cigarettes/day, former smoker and >20 cigarettes/day, current smoker and ≤20 cigarettes/day, current smoker and > 20 cigarettes/day, missing), diet quality (2015 Healthy Eating Index; 0–100 points), total energy intake (kcal/day), alcohol consumption (grams/day), parity (number of births), use of oral contraceptives (never or <1 year, 1–4 years, 5–9 years, ≥10 years, missing), menopausal hormone therapy use (never, continuous estrogen plus progestin (EPT) use [15+ days progestin/month], sequential EPT [<15 days progestin/month], estrogen only, missing) and, body mass index at age 18 years (normal weight [<25.0 kg/m<sup>2</sup>], overweight [25.0–29.9 kg/m<sup>2</sup>], obese class I [30.0–34.9 kg/m<sup>2</sup>], obese class II [35.0–39.9 kg/m<sup>2</sup>], and obese class III [≥40.0 kg/m<sup>2</sup>]), while excluding the confounder of interest.

<sup>d</sup>2015 HEI scores range from 0 (least healthy) to a 100 (most healthy) and describe diet quality as recommended by the 2015-2020 Dietary Guidelines for Americans.

<sup>e</sup>Indicates kcal/day per 1000.

Supplementary Table 7. Total effect for Maintaining high physical activity vs. Inactive (referent) by time of follow-up and excluding women that lost weight in the previous 10 years to baseline.

| Restriction factor                            | Events | Inactive <sup>a</sup><br>HR (95% CI) <sup>c</sup> | Maintain high <sup>b</sup><br>HR (95% CI) <sup>c</sup> |
|-----------------------------------------------|--------|---------------------------------------------------|--------------------------------------------------------|
| Follow-up                                     |        |                                                   |                                                        |
| 2+ (n=64,562)                                 | 1,251  | 1.00 (Ref)                                        | 0.74 (0.60, 0.90)                                      |
| 4+ (n=61,510)                                 | 1,030  | 1.00 (Ref)                                        | 0.72 (0.58, 0.90)                                      |
| 6+ (n=58,226)                                 | 815    | 1.00 (Ref)                                        | 0.75 (0.58, 0.95)                                      |
| Excluding weight loss (n=65,500) <sup>d</sup> | 1,430  | 1.00 (Ref)                                        | 0.80 (0.66, 0.97)                                      |

<sup>a</sup>Reported no activity at each age period (<1 hr/wk; n=5,561). HR = hazard ratio; CI = confidence interval.  
HR = hazard ratio; CI – confidence interval

<sup>b</sup>Maintained high levels of activity over time (n=21,843);

<sup>c</sup>Hazard ratios were adjusted for: age (years), race-ethnicity (Non-Hispanic white, Non-Hispanic black, Hispanic, Other or missing), education (less than high school, high school, post high-school or some college, Bachelor degree or more, missing), smoking status/dose (never smoker, former smoker and ≤20 cigarettes/day, former smoker and >20 cigarettes/day, current smoker and ≤20 cigarettes/day, current smoker and > 20 cigarettes/day, missing), diet quality (2015 Healthy Eating Index; 0–100 points), total energy intake (kcal/day), alcohol consumption (grams/day), parity (number of births), use of oral contraceptives (never or <1 year, 1–4 years, 5–9 years, ≥10 years, missing), menopausal hormone therapy use (never, continuous estrogen plus progestin (EPT) use [15+ days progestin/month], sequential EPT [<15 days progestin/month], estrogen only, missing) and, body mass index at age 18 years (normal weight [<25.0 kg/m<sup>2</sup>], overweight [25.0–29.9 kg/m<sup>2</sup>], obese class I [30.0–34.9 kg/m<sup>2</sup>], obese class II [35.0–39.9 kg/m<sup>2</sup>], and obese class III [≥40.0 kg/m<sup>2</sup>]).

<sup>d</sup>Excluding women that lost weight recently, i.e., those that reported a lower BMI at baseline when compared to the previous 1-10 years.
